# Supplementary material for: Facile access to template-shape-replicated nitrogen-rich mesoporous carbon nanospheres for highly efficient CO2 capture and contaminant removal
Source: Royal Society of Chemistry journal article supplement (doi:10.1039/d1ma00891a), 2021-11-16
Supplement: d1ma00891a1.pdf [file d1ma00891a1.pdf]

**Electronic Supplementary Information**

**Facile access to template-shape replicated nitrogen-rich  
mesoporous carbon nanospheres for highly efficient CO<sub>2</sub> capture  
and contaminant removal**

Shashikant Shingdilwar, Subrata Dolui, Devendra Kumar and Sanjib Banerjee\*

Department of Chemistry, Indian Institute of Technology Bhilai, Raipur 492015, Chhattisgarh, India

\*Corresponding Author: E-mail: [sanjib.banerjee@iitbhilai.ac.in](mailto:sanjib.banerjee@iitbhilai.ac.in) (S. Banerjee)

**Table S1.** Reaction conditions and results of the kinetics study of SC-ATRP of AN/VBC

| Entry | Time (h) | Polymer grafting <sup>b</sup> (%) | $M_{n,SEC}^c$ (g mol <sup>-1</sup> ) | $D^c$ |
|-------|----------|-----------------------------------|--------------------------------------|-------|
| P1    | 0.5      | 21                                | 8600                                 | 1.25  |
| P2    | 1        | 33                                | 13300                                | 1.23  |
| P3    | 2        | 44                                | 17800                                | 1.24  |
| P4    | 4        | 52                                | 20900                                | 1.21  |
| P5    | 8        | 58                                | 23400                                | 1.18  |
| P6    | 15       | 63                                | 25200                                | 1.17  |
| P7    | 24       | 66                                | 26400                                | 1.18  |

from MSN-Br in xylene at 90 °C.<sup>a</sup>

<sup>a</sup>Reaction Conditions: [AN+VBC]<sub>0</sub>/[MSN-Br]<sub>0</sub> = 200. <sup>b</sup>Determined from TGA. <sup>c</sup>Obtained from SEC measurements of the cleaved polymer samples.

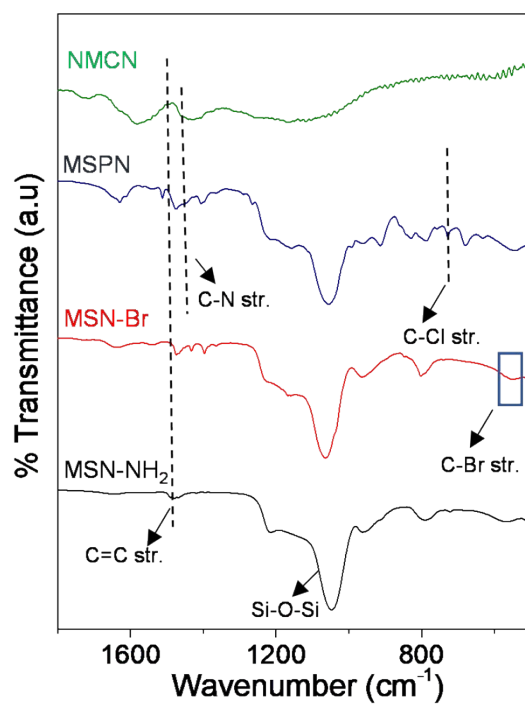

**Fig. S1** Zoomed-in IR spectra of the obtained porous MSN-NH<sub>2</sub>, MSN-Br, MSPAN-CH<sub>2</sub>Cl, and NMCN nanomaterials.
